# Supplementary material
Source: Springer Nature journal article supplement (https://www.springermedizin.de/resource/supplementary/12913_2007_622_MOESM1_ESM.pdf/9535816)

*competence and general attitude*

*professional approach*

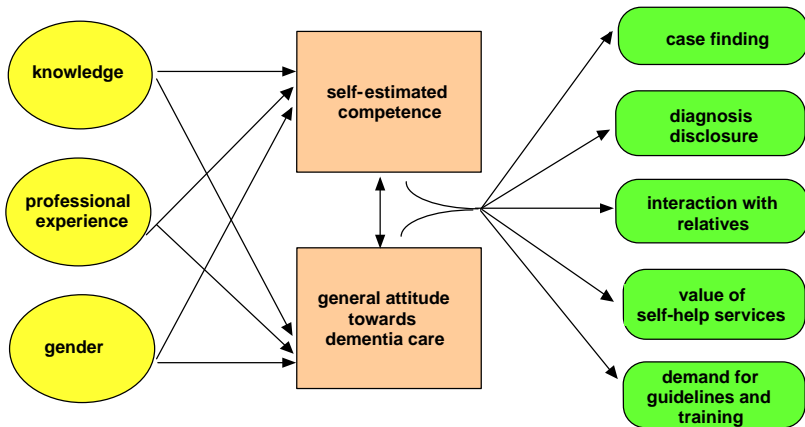

Supplement: MOESM1 [file 9535816]
